# Supplementary material for: Societal breakdown as an emergent property of large-scale behavioural models of land use change
Source: Copernicus journal article supplement (doi:10.5194/esd-10-809-2019), 2019-12-04
Supplement: Supplementary file 1 [file Supplement 1 - read me.docx]

Supplement 1 contains files defining the ecosystem service demand levels throughout each scenario. Baseline demands are given under the year 2016, and further values calculated as described in the main text. Demand values are related to production levels in some cases and are abstract in others; therefore values are normalised during the calculation of benefit values.
