# Supplementary material for: Societal breakdown as an emergent property of large-scale behavioural models of land use change
Source: Copernicus journal article supplement (doi:10.5194/esd-10-809-2019), 2019-12-04
Supplement: Supplementary file 3 [file Supplement 2 - read me.docx]

Supplement 2contains the following results from all simulations:

1. Land cover maps for the simulated year 2086
2. Demand-supply shortfalls (as proportion of demand) for food and timber

Further results summaries are available for interactive exploration at <https://landchange.earth/CRAFTY>

Details of parameterisations are given in Appendix A.
