# Supplementary material for: Societal breakdown as an emergent property of large-scale behavioural models of land use change
Source: Copernicus journal article supplement (doi:10.5194/esd-10-809-2019), 2019-12-04
Supplement: Supplementary file [file esd-10-809-2019-supplement-title-page.pdf › esd-10-809-2019-supplement-title-page.pdf]

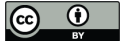

## *Supplement of*

# **Societal breakdown as an emergent property of large-scale behavioural models of land use change**

**Calum Brown et al.**

*Correspondence to:* Calum Brown ([calum.brown@kit.edu](mailto:calum.brown@kit.edu))

- [esd-10-809-2019-supplement-title-page.pdf](#)
- Supplements
  - Supplement 1 - demand files
    - \* RCP2\_6-SSP1.csv
    - \* RCP2\_6-SSP4.csv
    - \* RCP4\_5-SSP1.csv
    - \* RCP4\_5-SSP3.csv
    - \* RCP4\_5-SSP4.csv
    - \* RCP8\_5-SSP3.csv
    - \* RCP8\_5-SSP5.csv
    - \* Supplement 1 - read me.docx
  - Supplement 2 - full results summaries
    - \* 1 Land cover maps
    - \* 2 Demand-supply shortfalls
    - \* Supplement 2 - read me.docx

The copyright of individual parts of the supplement might differ from the CC BY 4.0 License.
